# Supplementary material for: Machine Learning Backpropagation Prediction and Analysis of the Thermal Degradation of Poly (Vinyl Alcohol)
Source: MDPI journal article supplement (doi:10.3390/polym16030437), 2024-02-05
Supplement: s1 [file s1]

## Mathematical Formulation of the PVA Thermograms for 2, 5, and 10 K/min Heating Rates

To formulate the mathematical models for the framework in Figure 2, it is necessary to start with the general mathematical expressions of artificial neural networks (ANNs) [28]. These expressions relate the predicted ( $a_5$ ) and real ( $y_i$ ) output signals with the inputs and hidden neurons corresponding to them. The following are mathematical expressions formulating the output through hidden neurons to input neurons (backpropagation).

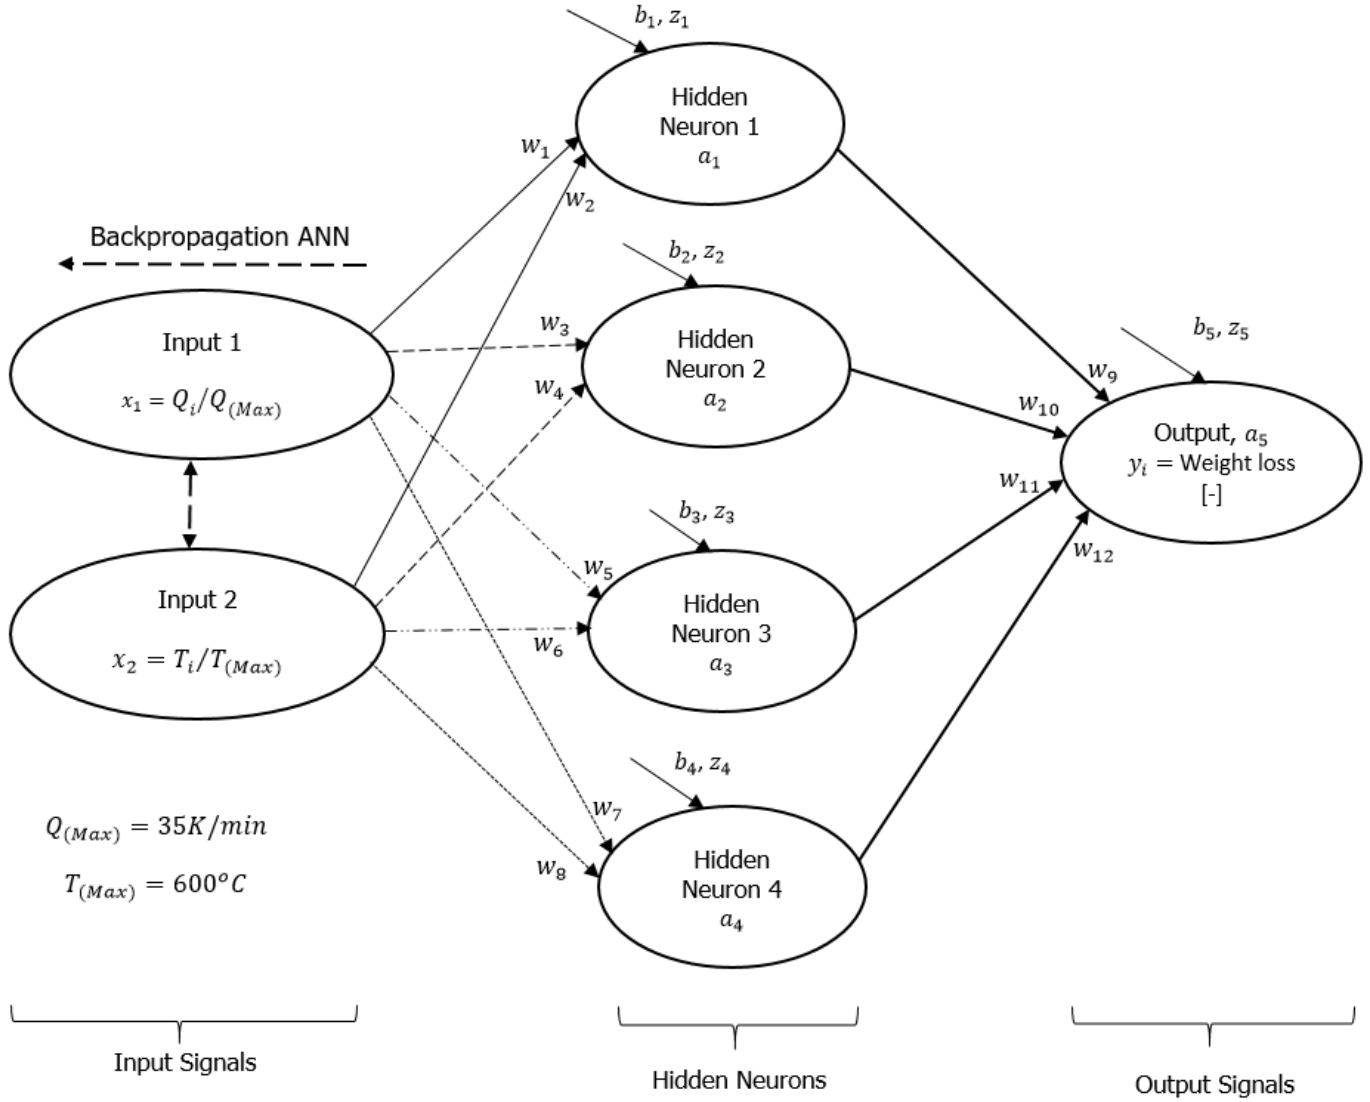

**Figure S1.** Machine learning backpropagation network analysis framework showing typical input, hidden and output neurons.

The sum of the weights of the output 5 ( $z_5$ ) using Figure 2 is expressed as a function of bias ( $b_5$ ), weights ( $w_9 - w_{12}$ ) and activation of the hidden neurons ( $a_1 - a_4$ ) as shown by Equation 1a.

$$z_5 = b_5 + w_9 \cdot a_1 + w_{10} \cdot a_2 + w_{11} \cdot a_3 + w_{12} \cdot a_4 \quad \text{Eqn 1a}$$

The logistic function of output 5 [ $\sigma'(z_5)$ ] also known as the Sigmoid activation ( $a_5$ ) or predicted signal is expressed as

$$a_5 = \sigma'(z_5) = \frac{1}{(1 + e^{-z_5})} \quad \text{Eqn 1b}$$

And the cost function ( $C$ ) is expressed as

$$C = (y_i - a_5)^2 \quad \text{Eqn 1c}$$

The logistic functions and sum weight for the four hidden neurons are expressed as follows:

$$a_1 = \sigma'(z_1) = \frac{1}{(1+e^{-z_1})} \& z_1 = b_1 + w_1.x_1 + w_2.x_2 \quad \text{Eqn 1d}$$

$$a_2 = \sigma'(z_2) = \frac{1}{(1+e^{-z_2})} \& z_2 = b_2 + w_3.x_1 + w_4.x_2 \quad \text{Eqn 1e}$$

$$a_3 = \sigma'(z_3) = \frac{1}{(1+e^{-z_3})} \& z_3 = b_3 + w_5.x_1 + w_6.x_2 \quad \text{Eqn 1f}$$

$$a_4 = \sigma'(z_4) = \frac{1}{(1+e^{-z_4})} \& z_4 = b_4 + w_7.x_1 + w_8.x_2 \quad \text{Eqn 1g}$$

where  $b_1 - b_5$  and  $w_1 - w_{12}$  are arbitrarily constants needed for predicting the output signal. Obtaining these values could be performed by trial and error, but this could be time consuming and tedious. Cost optimization is a more preferable approach and is described and mathematically expressed below:

### 1. How much does cost depend on output 5?

Since backpropagation ANN requires starting from the output data [26-28], the connections between the hidden and output layers can be referred to as linear, which is why single-layer neural networks (SNN) will be used to perform machine learning algorithms. As a result, a change in bias ( $\Delta b$ ) and weight ( $\Delta w$ ) is needed for the framework to be trained as shown in Figure 2 with Equation 2a.

$$\Delta b = -k_P \frac{\partial C}{\partial b} \quad \text{and} \quad \Delta w = -k_P \frac{\partial C}{\partial w} \quad \text{Eqn 2a}$$

where  $k_P$  is the learning rate, which is a value chosen for the training of the network in order to estimate the arbitrary constants.

$$\left(\frac{\partial C}{\partial a_5}\right) = 2(a_5 - y); \quad \left(\frac{\partial a_5}{\partial z_5}\right) = \sigma'(z_5) = \frac{e^{z_5}}{(1+e^{z_5})^2}; \quad \left(\frac{\partial z_5}{\partial w_9}\right) = a_1; \quad \left(\frac{\partial z_5}{\partial w_{10}}\right) = a_2; \quad \left(\frac{\partial z_5}{\partial w_{11}}\right) = a_3; \quad \left(\frac{\partial z_5}{\partial w_{12}}\right) = a_4 \quad \text{and} \quad \left(\frac{\partial z_5}{\partial b_5}\right) = 1. \quad \text{Eqn 2b}$$

$$\left(\frac{\partial C}{\partial b_5}\right) = \left(\frac{\partial C}{\partial a_5}\right) \left(\frac{\partial a_5}{\partial z_5}\right) \left(\frac{\partial z_5}{\partial b_5}\right) \quad \text{Eqn 2c}$$

$$\left(\frac{\partial C}{\partial w_9}\right) = \left(\frac{\partial C}{\partial a_5}\right) \left(\frac{\partial a_5}{\partial z_5}\right) \left(\frac{\partial z_5}{\partial w_9}\right) \quad \text{Eqn 2d}$$

$$\left(\frac{\partial C}{\partial w_{10}}\right) = \left(\frac{\partial C}{\partial a_5}\right) \left(\frac{\partial a_5}{\partial z_5}\right) \left(\frac{\partial z_5}{\partial w_{10}}\right) \quad \text{Eqn 2e}$$

$$\left(\frac{\partial C}{\partial w_{11}}\right) = \left(\frac{\partial C}{\partial a_5}\right) \left(\frac{\partial a_5}{\partial z_5}\right) \left(\frac{\partial z_5}{\partial w_{11}}\right) \quad \text{Eqn 2f}$$

$$\left(\frac{\partial C}{\partial w_{12}}\right) = \left(\frac{\partial C}{\partial a_5}\right) \left(\frac{\partial a_5}{\partial z_5}\right) \left(\frac{\partial z_5}{\partial w_{12}}\right) \quad \text{Eqn 2g}$$

$$\text{Hence: } \Delta b_5 = -k_P \left( \sum_{i=1}^N \left( \frac{\partial C}{\partial b_5} \right) \right) / N \quad \& \quad b_{5(New)} = b_{5(Old)} + \Delta b_5 \quad \text{Eqn 2h}$$

$$\Delta w_9 = -k_P \left( \sum_{i=1}^N \left( \frac{\partial C}{\partial w_9} \right) \right) / N \quad \& \quad w_{9(New)} = w_{9(Old)} + \Delta w_9 \quad \text{Eqn 2i}$$

$$\Delta w_{10} = -k_P \left( \sum_{i=1}^N \left( \frac{\partial C}{\partial w_{10}} \right) \right) / N \quad \& \quad w_{10(New)} = w_{10(Old)} + \Delta w_{10} \quad \text{Eqn 2j}$$

$$\Delta w_{11} = -k_P \left( \sum_{i=1}^N \left( \frac{\partial C}{\partial w_{11}} \right) \right) / N \quad \& \quad w_{11(New)} = w_{11(Old)} + \Delta w_{11} \quad \text{Eqn 2k}$$

$$\Delta w_{12} = -k_P \left( \sum_{i=1}^N \left( \frac{\partial C}{\partial w_{12}} \right) \right) / N \quad \& \quad w_{12(New)} = w_{12(Old)} + \Delta w_{12} \quad \text{Eqn 2l}$$

## 2. Cost of output 5 on the hidden neurons

In this stage, the cost is estimated by estimating how much the hidden activations affect the cost,  $a_1 - a_4$ . The mathematical expression for estimating this type of cost function is given by Equation 3a.

$$\left(\frac{\partial C}{\partial a_h}\right) = \left(\frac{\partial C}{\partial a_j}\right) \left(\frac{\partial a_j}{\partial z}\right) \left(\frac{\partial z}{\partial a_h}\right) \quad \text{where} \quad \left(\frac{\partial z}{\partial a_h}\right) = w \quad \text{Eqn 3a}$$

When Equation 3a is applied to the hidden neurons in Figure 2, the following equations are obtained:

$$\left(\frac{\partial C}{\partial a_1}\right) = \left(\frac{\partial C}{\partial a_5}\right) \left(\frac{\partial a_5}{\partial z_5}\right) \left(\frac{\partial z_5}{\partial a_1}\right) \quad \text{where} \quad \left(\frac{\partial a_5}{\partial z_5}\right) = \sigma'(z_5) = \frac{e^{z_5}}{(1+e^{z_5})^2} \quad \& \quad \left(\frac{\partial z_5}{\partial a_1}\right) = w_9 \quad \text{Eqn 3b}$$

$$\left(\frac{\partial C}{\partial a_2}\right) = \left(\frac{\partial C}{\partial a_5}\right) \left(\frac{\partial a_5}{\partial z_5}\right) \left(\frac{\partial z_5}{\partial a_2}\right) \quad \text{where} \quad \left(\frac{\partial z_5}{\partial a_2}\right) = w_{10} \quad \text{Eqn 3c}$$

$$\left(\frac{\partial C}{\partial a_3}\right) = \left(\frac{\partial C}{\partial a_5}\right) \left(\frac{\partial a_5}{\partial z_5}\right) \left(\frac{\partial z_5}{\partial a_3}\right) \quad \text{where} \quad \left(\frac{\partial z_5}{\partial a_3}\right) = w_{11} \quad \text{Eqn 3d}$$

$$\left(\frac{\partial C}{\partial a_4}\right) = \left(\frac{\partial C}{\partial a_5}\right) \left(\frac{\partial a_5}{\partial z_5}\right) \left(\frac{\partial z_5}{\partial a_4}\right) \quad \text{where} \quad \left(\frac{\partial z_5}{\partial a_4}\right) = w_{12} \quad \text{Eqn 3e}$$

## 3. The cost function on inputs 1 and 2

By adopting the single-layer neural network (SNN), the hidden neurons can be trained to depend on inputs 1 and 2. In other words, input neurons and hidden layers are assumed to have a linear relationship. Hence, the mathematical relationship for these cost functions can be obtained from Equation 4 below at this stage of the mathematical formulation.

$$\frac{\partial C}{\partial w} = \left(\frac{\partial C}{\partial a}\right) \left(\frac{\partial a}{\partial z}\right) \left(\frac{\partial z}{\partial w}\right); \quad \frac{\partial C}{\partial b} = \left(\frac{\partial C}{\partial a}\right) \left(\frac{\partial a}{\partial z}\right) \left(\frac{\partial z}{\partial b}\right) \quad \text{Eqn 4}$$

### **Inputs connected to hidden neuron 1**

$$\left(\frac{\partial C}{\partial b_1}\right) = \left(\frac{\partial C}{\partial a_1}\right) \left(\frac{\partial a_1}{\partial z_1}\right) \left(\frac{\partial z_1}{\partial b_1}\right) \quad \text{where } \left(\frac{\partial z_1}{\partial b_1}\right) = 1 \quad \& \quad \left(\frac{\partial a_1}{\partial z_1}\right) = \sigma'(z_1) = \frac{e^{z_1}}{(1+e^{z_1})^2} \quad \text{Eqn 5a}$$

$$\left(\frac{\partial C}{\partial w_1}\right) = \left(\frac{\partial C}{\partial a_1}\right) \left(\frac{\partial a_1}{\partial z_1}\right) \left(\frac{\partial z_1}{\partial w_1}\right) \quad \text{where } \left(\frac{\partial z_1}{\partial w_1}\right) = x_1 \quad \text{Eqn 5b}$$

$$\left(\frac{\partial C}{\partial w_2}\right) = \left(\frac{\partial C}{\partial a_1}\right) \left(\frac{\partial a_1}{\partial z_1}\right) \left(\frac{\partial z_1}{\partial w_2}\right) \quad \text{where } \left(\frac{\partial z_1}{\partial w_2}\right) = x_2 \quad \text{Eqn 5c}$$

$$\text{Hence: } \Delta b_1 = -k_P \left(\sum_{i=1}^N \left(\frac{\partial C}{\partial b_1}\right)\right) / N \quad \& \quad b_{1(New)} = b_{1(Old)} + \Delta b_1 \quad \text{Eqn 5d}$$

$$\Delta w_1 = -k_P \left(\sum_{i=1}^N \left(\frac{\partial C}{\partial w_1}\right)\right) / N \quad \& \quad w_{1(New)} = w_{1(Old)} + \Delta w_1 \quad \text{Eqn 5e}$$

$$\Delta w_2 = -k_P \left(\sum_{i=1}^N \left(\frac{\partial C}{\partial w_2}\right)\right) / N \quad \& \quad w_{2(New)} = w_{2(Old)} + \Delta w_2 \quad \text{Eqn 5f}$$

### **Inputs connected to hidden neuron 2**

$$\left(\frac{\partial C}{\partial b_2}\right) = \left(\frac{\partial C}{\partial a_2}\right) \left(\frac{\partial a_2}{\partial z_2}\right) \left(\frac{\partial z_2}{\partial b_2}\right) \quad \text{where } \left(\frac{\partial z_2}{\partial b_2}\right) = 1 \quad \& \quad \left(\frac{\partial a_2}{\partial z_2}\right) = \sigma'(z_2) = \frac{e^{z_2}}{(1+e^{z_2})^2} \quad \text{Eqn 6a}$$

$$\left(\frac{\partial C}{\partial w_3}\right) = \left(\frac{\partial C}{\partial a_2}\right) \left(\frac{\partial a_2}{\partial z_2}\right) \left(\frac{\partial z_2}{\partial w_3}\right) \quad \text{where } \left(\frac{\partial z_2}{\partial w_3}\right) = x_1 \quad \text{Eqn 6b}$$

$$\left(\frac{\partial C}{\partial w_4}\right) = \left(\frac{\partial C}{\partial a_2}\right) \left(\frac{\partial a_2}{\partial z_2}\right) \left(\frac{\partial z_2}{\partial w_4}\right) \quad \text{where } \left(\frac{\partial z_2}{\partial w_4}\right) = x_2 \quad \text{Eqn 6c}$$

$$\text{Hence: } \Delta b_2 = -k_P \left(\sum_{i=1}^N \left(\frac{\partial C}{\partial b_2}\right)\right) / N \quad \& \quad b_{2(New)} = b_{2(Old)} + \Delta b_2 \quad \text{Eqn 6d}$$

$$\Delta w_3 = -k_P \left(\sum_{i=1}^N \left(\frac{\partial C}{\partial w_3}\right)\right) / N \quad \& \quad w_{3(New)} = w_{3(Old)} + \Delta w_3 \quad \text{Eqn 6e}$$

$$\Delta w_4 = -k_P \left(\sum_{i=1}^N \left(\frac{\partial C}{\partial w_4}\right)\right) / N \quad \& \quad w_{4(New)} = w_{4(Old)} + \Delta w_4 \quad \text{Eqn 6f}$$

### **Inputs connected to hidden neuron 3**

$$\left(\frac{\partial C}{\partial b_3}\right) = \left(\frac{\partial C}{\partial a_3}\right) \left(\frac{\partial a_3}{\partial z_3}\right) \left(\frac{\partial z_3}{\partial b_3}\right) \quad \text{where } \left(\frac{\partial z_3}{\partial b_3}\right) = 1 \quad \& \quad \left(\frac{\partial a_3}{\partial z_3}\right) = \sigma'(z_3) = \frac{e^{z_3}}{(1+e^{z_3})^2} \quad \text{Eqn 7a}$$

$$\left(\frac{\partial C}{\partial w_5}\right) = \left(\frac{\partial C}{\partial a_3}\right) \left(\frac{\partial a_3}{\partial z_3}\right) \left(\frac{\partial z_3}{\partial w_5}\right) \quad \text{where } \left(\frac{\partial z_3}{\partial w_5}\right) = x_1 \quad \text{Eqn 7b}$$

$$\left(\frac{\partial C}{\partial w_6}\right) = \left(\frac{\partial C}{\partial a_3}\right) \left(\frac{\partial a_3}{\partial z_3}\right) \left(\frac{\partial z_3}{\partial w_6}\right) \quad \text{where } \left(\frac{\partial z_3}{\partial w_6}\right) = x_2 \quad \text{Eqn 7c}$$

$$\text{Hence: } \Delta b_3 = -k_P \left( \sum_{i=1}^N \left( \frac{\partial C}{\partial b_3} \right) \right) / N \quad \& \quad b_{3(New)} = b_{3(old)} + \Delta b_3 \quad \text{Eqn 7d}$$

$$\Delta w_5 = -k_P \left( \sum_{i=1}^N \left( \frac{\partial C}{\partial w_5} \right) \right) / N \quad \& \quad w_{5(New)} = w_{5(New)} + \Delta w_5 \quad \text{Eqn 7e}$$

$$\Delta w_6 = -k_P \left( \sum_{i=1}^N \left( \frac{\partial C}{\partial w_6} \right) \right) / N \quad \& \quad w_{6(New)} = w_{6(New)} + \Delta w_6 \quad \text{Eqn 7f}$$

#### Inputs connected to hidden neuron 4

$$\left( \frac{\partial C}{\partial b_4} \right) = \left( \frac{\partial C}{\partial a_4} \right) \left( \frac{\partial a_4}{\partial z_4} \right) \left( \frac{\partial z_4}{\partial b_4} \right) \quad \text{where} \quad \left( \frac{\partial z_4}{\partial b_4} \right) = 1 \quad \& \quad \left( \frac{\partial a_4}{\partial z_4} \right) = \sigma'(z_4) = \frac{e^{z_4}}{(1+e^{z_4})^2} \quad \text{Eqn 8a}$$

$$\left( \frac{\partial C}{\partial w_7} \right) = \left( \frac{\partial C}{\partial a_4} \right) \left( \frac{\partial a_4}{\partial z_4} \right) \left( \frac{\partial z_4}{\partial w_7} \right) \quad \text{where} \quad \frac{\partial z_4}{\partial w_7} = x_1 \quad \text{Eqn 8b}$$

$$\left( \frac{\partial C}{\partial w_8} \right) = \left( \frac{\partial C}{\partial a_4} \right) \left( \frac{\partial a_4}{\partial z_4} \right) \left( \frac{\partial z_4}{\partial w_8} \right) \quad \text{where} \quad \left( \frac{\partial z_4}{\partial w_8} \right) = x_2 \quad \text{Eqn 8c}$$

$$\text{Hence: } \Delta b_4 = -k_P \left( \sum_{i=1}^N \left( \frac{\partial C}{\partial b_4} \right) \right) / N \quad \& \quad b_{4(New)} = b_{4(old)} + \Delta b_4 \quad \text{Eqn 8d}$$

$$\Delta w_7 = -k_P \left( \sum_{i=1}^N \left( \frac{\partial C}{\partial w_7} \right) \right) / N \quad \& \quad w_{7(New)} = w_{7(old)} + \Delta w_7 \quad \text{Eqn 8e}$$

$$\Delta w_8 = -k_P \left( \sum_{i=1}^N \left( \frac{\partial C}{\partial w_8} \right) \right) / N \quad \& \quad w_{8(New)} = w_{8(old)} + \Delta w_8 \quad \text{Eqn 8d}$$

In this way, Equations 2–8 are trained to minimize the cost function between the real and predicted output signals to almost zero and to obtain optimum values for arbitrary constants.
